# Supplementary material
Source: HighWire-hosted journal article supplement (https://qualitysafety.bmj.com/content/bmjqs-2019-009921)
Supplement: inline-supplementary-material-5 [file inline-supplementary-material-5.pdf]

## Appendix E. Quality Assessment Tool (QATSDD) scores for all reviewed papers (scores range from 0 – 3)

| Citation Number | Item 1 | Item 2 | Item 3 | Item 4 | Item 5 | Item 6 | Item 7 | Item 8 | Item 9 | Item 10 | Item 11 | Item 12 | Item 13 | Item 14 | Item 15 | Item 16 | Score | %   |
|-----------------|--------|--------|--------|--------|--------|--------|--------|--------|--------|---------|---------|---------|---------|---------|---------|---------|-------|-----|
| 46              | 3      | 3      | 3      | 3      | 3      | 3      | 3      | 1      | 0      | 3       | N/A     | 3       | 3       | N/A     | 1       | 3       | 35/42 | 83% |
| 39              | 3      | 3      | 1      | 2      | 3      | 3      | 2      | 2      | N/A    | N/A     | 3       | 3       | 2       | 2       | 0       | 3       | 32/42 | 76% |
| 25              | 3      | 2      | 3      | 0      | 0      | 3      | 3      | 0      | N/A    | N/A     | 3       | 0       | 0       | 0       | 0       | 2       | 19/42 | 45% |
| 40              | 2      | 3      | 1      | 0      | 3      | 3      | 2      | 1      | 3      | 3       | N/A     | 3       | 3       | N/A     | 1       | 3       | 31/42 | 74% |
| 47              | 3      | 3      | 2      | 3      | 3      | 3      | 1      | 2      | 1      | 3       | N/A     | 3       | 3       | N/A     | 0       | 3       | 33/42 | 79% |
| 36              | 3      | 3      | 1      | 0      | 1      | 3      | 3      | 0      | N/A    | N/A     | 3       | 0       | 0       | 0       | 2       | 3       | 22/42 | 52% |
| 37              | 3      | 3      | 1      | 0      | 2      | 3      | 1      | 3      | 0      | 3       | 3       | 2       | 1       | 0       | 3       | 3       | 31/48 | 65% |
| 41              | 3      | 2      | 3      | 0      | 0      | 3      | 2      | 0      | N/A    | N/A     | 1       | 0       | 0       | 0       | 1       | 2       | 17/42 | 40% |
| 38              | 2      | 2      | 0      | 0      | 2      | 2      | 3      | 1      | N/A    | N/A     | 2       | 1       | 0       | 0       | 2       | 3       | 20/42 | 48% |
| 42              | 2      | 2      | 3      | 0      | 0      | 3      | 3      | 0      | N/A    | N/A     | 2       | 1       | 0       | 0       | 1       | 2       | 19/42 | 45% |
| 43              | 3      | 2      | 0      | 0      | 0      | 3      | 3      | 0      | N/A    | N/A     | 3       | 1       | 0       | 0       | 2       | 2       | 19/42 | 45% |
| 44              | 2      | 3      | 0      | 0      | 1      | 2      | 0      | 0      | 0      | 3       | N/A     | 3       | 1       | N/A     | 0       | 3       | 18/42 | 43% |
| 45              | 3      | 3      | 3      | 0      | 2      | 3      | 3      | 2      | 2      | 3       | 2       | 3       | 2       | 0       | 0       | 3       | 34/48 | 71% |
| 48              | 1      | 3      | 2      | 0      | 2      | 3      | 3      | 1      | 3      | 3       | N/A     | 3       | 1       | N/A     | 2       | 3       | 30/42 | 71% |
| 49              | 3      | 3      | 1      | 0      | 2      | 2      | 2      | 1      | 2      | 3       | 3       | 3       | 1       | 1       | 0       | 2       | 29/48 | 60% |

Item 1: Explicit theoretical framework

Item 2: Statement of aims/objectives in main report

Item 3: Clear description of research setting

Item 4: Evidence of sample size considered in terms of analysis

Item 5: Representative sample of target group of a reasonable size

Item 6: Description of procedure for data collection

Item 7: Rationale for choice of data collection tool(s)

Item 8: Detailed recruitment data

Item 9: Statistical assessment of reliability and validity of measurement tool(s) (Quantitative studies only)

Item 10: Fit between research question and method of data collection (Quantitative studies only)

Item 11: Fit between research question and format and content of data collection tool e.g. interview schedule (Qualitative studies only)

Item 12: Fit between research question and method of analysis (Quantitative studies only)

Item 13: Good justification for analytic method selected

Item 14: Assessment of reliability of analytic process (Qualitative studies only)

Item 15: Evidence of user involvement in design

Item 16: Strengths and limitations critically discussed
